# Supplementary material for: Diverse dose-response effects of yolk androgens on embryo development and nestling growth in a wild passerine
Source: Oxford University Press journal article supplement (doi:10.1242/jeb.118257), 2015-01-01
Supplement: jeb118257supp.pdf [file jeb118257supp.pdf]

**Table S1** Number of non hatched and hatched eggs per each treatment.

| <i>Treatment</i>    | <i>Non Hatched</i> | <i>Hatched</i> | <i>Total</i> | <i>% Hatched</i> |
|---------------------|--------------------|----------------|--------------|------------------|
| <b>Control</b>      | 59                 | 123            | 182          | 67.58            |
| <b>T2</b>           | 13                 | 43             | 56           | 76.78            |
| <b>T4</b>           | 29                 | 41             | 70           | 58.57            |
| <b>T8</b>           | 24                 | 45             | 69           | 65.21            |
| <b>Non injected</b> | 14                 | 219            | 233          | 93.99            |

**Table S2** Initial mixed models for tarsus length, body mass, body condition and gape width of spotless starling on nestling period. Nonsignificant variables were removed from the model based on stepwise selection by *p-values* criterion ( $p < 0.05$ , corresponding to the numbers in bold).

| Independent variable                  | Tarsus length |         |                  | Body mass |         |                  | Body condition |       |                  | Gape width |        |                  |
|---------------------------------------|---------------|---------|------------------|-----------|---------|------------------|----------------|-------|------------------|------------|--------|------------------|
|                                       | d.f.          | F       | P                | d.f.      | F       | P                | d.f.           | F     | P                | d.f.       | F      | P                |
| Treat                                 | 1/560         | 0.88    | 0.3496           | 1/566     | 0.02    | 0.8987           | 1/589          | 0.34  | 0.5623           | 1/591      | 10.83  | <b>0.0011</b>    |
| Treat <sup>2</sup>                    | 1/585         | 0.69    | 0.4061           | 1/584     | 0.73    | 0.3946           | 1/565          | 3.76  | <b>0.0530</b>    | 1/560      | 0.22   | 0.6407           |
| Treat <sup>2</sup> × Age [days]       | 3/538         | 4.94    | <b>0.0022</b>    | 3/539     | 4.17    | <b>0.0062</b>    | 3/545          | 1.68  | 0.1699           | 3/536      | 0.92   | 0.4297           |
| Treat <sup>2</sup> × Sex              | 1/580         | 0.31    | 0.5796           | 1/582     | 0.62    | 0.4309           | 1/573          | 0.32  | 0.5736           | 1/580      | 0.76   | 0.3832           |
| Treat <sup>2</sup> × Sex × Age [days] | 3/530         | 0.13    | 0.9411           | 3/531     | 0.06    | 0.9796           | 3/532          | 0.40  | 0.7508           | 3/529      | 0.02   | 0.9962           |
| Trt × Age [days]                      | 3/538         | 2.30    | 0.0761           | 3/539     | 2.08    | 0.1020           | 3/548          | 1.45  | 0.2271           | 3/541      | 0.11   | 0.9540           |
| Trt × Sex × Age [days]                | 3/533         | 0.20    | 0.8960           | 3/534     | 0.15    | 0.9307           | 3/535          | 0.43  | 0.7292           | 3/532      | 1.65   | 0.1760           |
| Age [days]                            | 3/538         | 3257.40 | <b>&lt;0.001</b> | 3/539     | 1662.52 | <b>&lt;0.001</b> | 3/551          | 0.00  | 0.9997           | 3/548      | 924.72 | <b>&lt;0.001</b> |
| Sex                                   | 1/575         | 10.99   | <b>0.0010</b>    | 1/577     | 15.74   | <b>&lt;0.001</b> | 1/588          | 0.56  | 0.4537           | 1/596      | 9.98   | <b>0.0017</b>    |
| Trt × Sex                             | 1/573         | 0.52    | 0.4717           | 1/576     | 0.69    | 0.4050           | 1/587          | 0.20  | 0.6553           | 1/586      | 0.04   | 0.8420           |
| Sex × Age [days]                      | 3/538         | 5.68    | <b>&lt;0.001</b> | 3/539     | 7.46    | <b>&lt;0.001</b> | 3/539          | 0.01  | 0.9983           | 3/547      | 2.43   | 0.0640           |
| Clutch laying date                    | 1/130         | 26.65   | <b>&lt;0.001</b> | 1/119     | 1.84    | 0.1771           | 1/89.6         | 13.96 | <b>0.0003</b>    | 1/88.4     | 15.55  | <b>&lt;0.001</b> |
| Egg volume                            | 1/261         | 5.41    | <b>0.0208</b>    | 1/233     | 9.26    | <b>0.0026</b>    | 1/140          | 9.77  | <b>0.0022</b>    | 1/149      | 0.53   | 0.4674           |
| Laying order                          | 1/571         | 95.01   | <b>&lt;0.001</b> | 1/574     | 90.77   | <b>&lt;0.001</b> | 1/600          | 18.40 | <b>&lt;0.001</b> | 1/592      | 1.38   | 0.2402           |
| EDP                                   | 1/422         | 20.84   | <b>&lt;0.001</b> | 1/418     | 13.11   | <b>&lt;0.001</b> | 1/254          | 0.66  | 0.4171           | 1/250      | 3.97   | <b>0.0474</b>    |
| Brood size                            | 1/582         | 3.65    | <b>0.0566</b>    | 1/583     | 10.87   | <b>0.0010</b>    | 1/591          | 1.17  | 0.2794           | 1/590      | 9.86   | <b>0.0018</b>    |
| Tarsus length                         | —             | —       | —                | —         | —       | —                | —              | —     | —                | 1/588      | 71.74  | <b>&lt;0.001</b> |

**Table S3.** Summary of final repeated-measures mixed models showing the estimates and standard error (estimate  $\pm$  SE) of all the variables affecting tarsus length, body mass, body condition and gape width of nestlings. Models were run using Proc Mixed with Satterthwaite correction to adjust the degrees of freedom. Age was measured in days (3, 6, 10 and 14).

|                                      | <b>Tarsus length</b>                | <b>Body mass</b>                    | <b>Body condition</b>               | <b>Gape width</b>                   |
|--------------------------------------|-------------------------------------|-------------------------------------|-------------------------------------|-------------------------------------|
| <b>Independent variable</b>          | <i>Estimate <math>\pm</math> SE</i> | <i>Estimate <math>\pm</math> SE</i> | <i>Estimate <math>\pm</math> SE</i> | <i>Estimate <math>\pm</math> SE</i> |
| Intercept                            | 29.958 $\pm$ 0.224                  | 72.161 $\pm$ 0.979                  | -0.1610 $\pm$ 0.095                 | 23.235 $\pm$ 0.139                  |
| Treat                                | 0.156 $\pm$ 0.075                   | 0.307 $\pm$ 0.335                   | -0.0175 $\pm$ 0.030                 | 0.0829 $\pm$ 0.025                  |
| Age [3]                              | -18.709 $\pm$ 0.245                 | -58.865 $\pm$ 1.099                 | —                                   | -3.645 $\pm$ 0.128                  |
| Age [6]                              | -11.520 $\pm$ 0.242                 | -39.906 $\pm$ 1.086                 | —                                   | 1.517 $\pm$ 0.128                   |
| Age [10]                             | -2.219 $\pm$ 0.242                  | -8.824 $\pm$ 1.086                  | —                                   | 2.713 $\pm$ 0.128                   |
| Treat $\times$ Age [3]               | -0.212 $\pm$ 0.103                  | -0.585 $\pm$ 0.465                  | —                                   | —                                   |
| Treat $\times$ Age [6]               | -0.214 $\pm$ 0.103                  | -0.775 $\pm$ 0.463                  | —                                   | —                                   |
| Treat $\times$ Age [10]              | -0.0476 $\pm$ 0.103                 | 0.224 $\pm$ 0.463                   | —                                   | —                                   |
| Sex (Males)                          | 0.864 $\pm$ 0.185                   | 4.571 $\pm$ 0.831                   | —                                   | 0.327 $\pm$ 0.104                   |
| Age [3] $\times$ Sex (Males)         | -0.994 $\pm$ 0.252                  | -5.051 $\pm$ 1.130                  | —                                   | —                                   |
| Age [6] $\times$ Sex (Males)         | -0.686 $\pm$ 0.250                  | -3.748 $\pm$ 1.124                  | —                                   | —                                   |
| Age [10] $\times$ Sex (Males)        | -0.393 $\pm$ 0.250                  | -2.097 $\pm$ 1.124                  | —                                   | —                                   |
| Treat <sup>2</sup>                   | -0.0916 $\pm$ 0.034                 | -0.0792 $\pm$ 0.152                 | 0.0292 $\pm$ 0.015                  | —                                   |
| Treat <sup>2</sup> $\times$ Age [3]  | 0.119 $\pm$ 0.045                   | 0.309 $\pm$ 0.202                   | —                                   | —                                   |
| Treat <sup>2</sup> $\times$ Age [6]  | 0.148 $\pm$ 0.044                   | 0.477 $\pm$ 0.200                   | —                                   | —                                   |
| Treat <sup>2</sup> $\times$ Age [10] | 0.0313 $\pm$ 0.044                  | -0.161 $\pm$ 0.200                  | —                                   | —                                   |
| Clutch laying date                   | 0.278 $\pm$ 0.054                   | —                                   | -0.1210 $\pm$ 0.032                 | -0.177 $\pm$ 0.045                  |
| Egg volume                           | 0.112 $\pm$ 0.048                   | 0.643 $\pm$ 0.211                   | 0.0959 $\pm$ 0.031                  | —                                   |
| Laying order                         | -0.251 $\pm$ 0.026                  | -1.099 $\pm$ 0.115                  | -0.0823 $\pm$ 0.019                 | —                                   |
| EDP                                  | -0.184 $\pm$ 0.040                  | -0.644 $\pm$ 0.177                  | —                                   | 0.075 $\pm$ 0.037                   |
| Brood size                           | -0.0725 $\pm$ 0.038                 | -0.559 $\pm$ 0.169                  | —                                   | 0.117 $\pm$ 0.037                   |
| Tarsus length                        | —                                   | —                                   | —                                   | 0.258 $\pm$ 0.030                   |
